# Supplementary material for: Interaction of Antifungal Drugs with CYP3A- and OATP1B-Mediated Venetoclax Elimination
Source: MDPI journal article supplement (doi:10.3390/pharmaceutics14040694), 2022-03-23
Supplement: s1 [file s1]

# Supplementary Materials: Interaction of Antifungal Drugs with CYP3A- and OATP1B-Mediated Venetoclax Elimination

Eric D. Eisenmann, Dominique A. Garrison, Zahra Talebi, Yan Jin, Josie A. Silvaroli, Jin Gyu Kim, Alex Sparreboom, Michael R. Savona, Alice S. Mims and Sharyn D. Baker

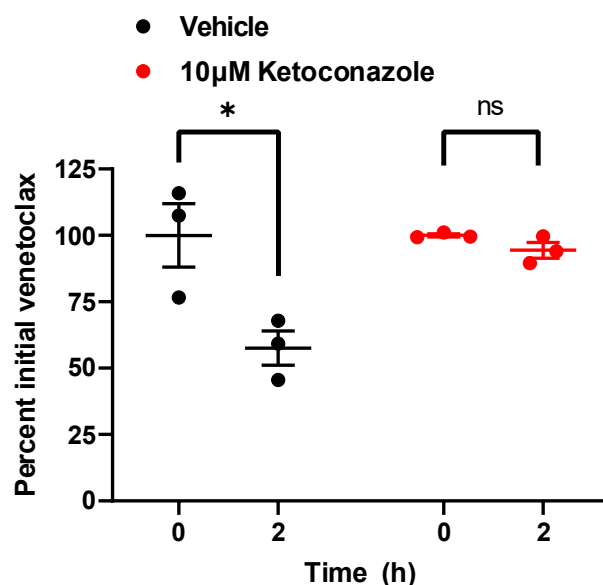

**Figure S1.** Venetoclax is metabolized by human CYP3A4 in vitro. 10 µM venetoclax was incubated with 40 nM human CYP3A4 supersomes and 10 µM ketoconazole or vehicle (DMSO) for 0 h or 2 h. Venetoclax concentrations (ng/mL) were normalized to concentrations of venetoclax at 0 h. \*  $p < 0.05$ .

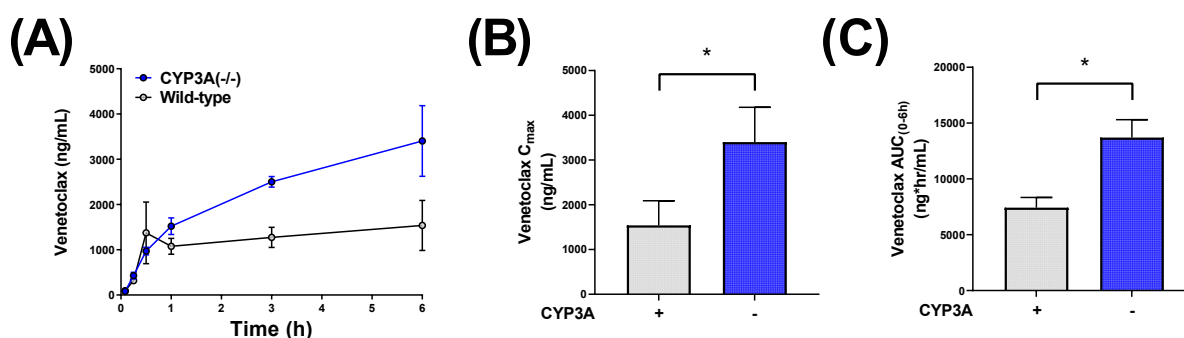

**Figure S2.** Venetoclax exposure is partially mediated by CYP3A. **(A)** Plasma concentration curves of venetoclax in female FVB wild-type or CYP3A(-/-) mice administered venetoclax (10 mg/kg; PO). Serial plasma samples were collected from each mouse and analyzed via LC-MS/MS. **(B)** Maximum concentration (C<sub>max</sub>) and **(C)** area under the concentration-time curve (AUC) using the last observed timepoint (AUC<sub>0-6h</sub>) calculated with non-compartmental analysis (NCA) using Phoenix WinNonlin 8.1. \*  $p < 0.05$ .

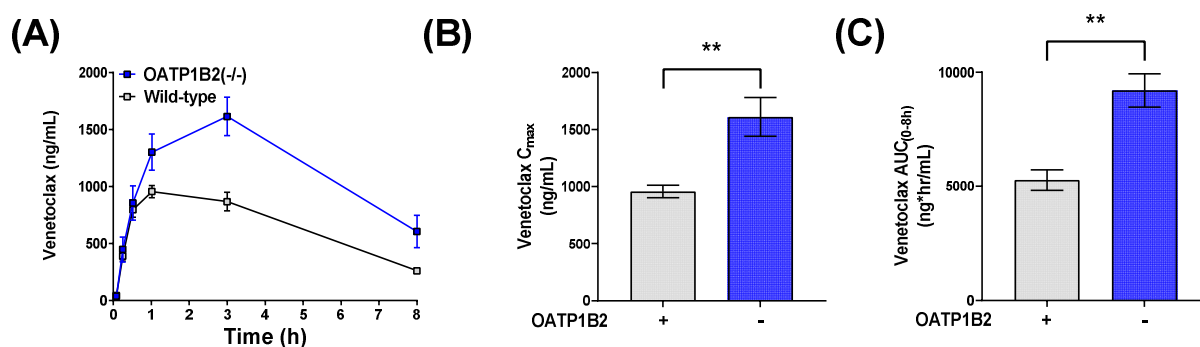

**Figure S3.** Genetic deletion of OATP1B2 increases venetoclax exposure in male mice. **(A)** Plasma concentration curves of venetoclax in male wild-type DBA or OATP1B2(-/-) mice administered venetoclax (10mg/kg; PO) (n=10/group). Serial plasma samples were collected from each mouse and analyzed via LC-MS/MS. **(B)** Maximum concentration (C<sub>max</sub>) and **(C)** area under the concentration-time curve (AUC) using the last observed timepoint (AUC<sub>0-8h</sub>) calculated with non-compartmental analysis (NCA) using Phoenix WinNonlin 8.1. \*\*  $p < 0.01$ .

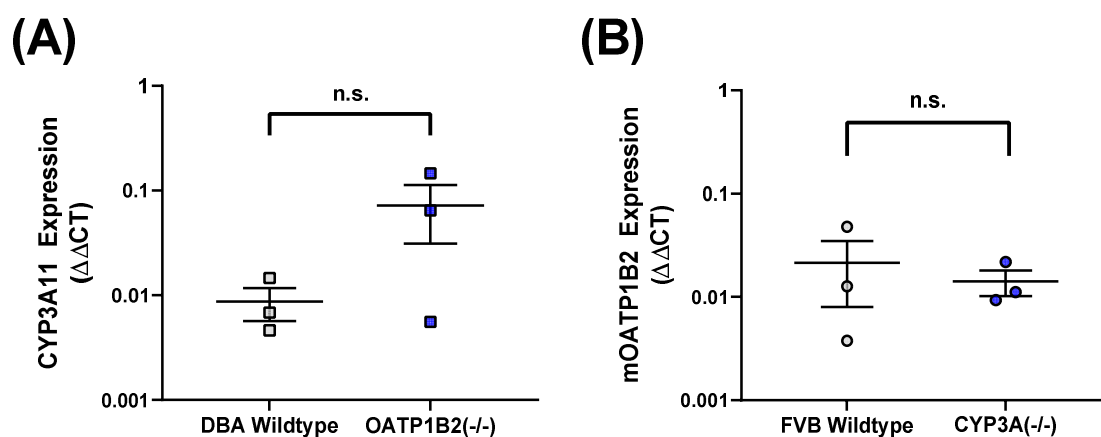

**Figure S4.** Expression of CYP3A11 and OATP1B2 in OATP1B2(-/-) and CYP3A(-/-) mice. Livers were harvested from female CYP3A(-/-), FVB wild-type, Oatp1b2(-/-), and DBA wild-type mice between 8 and 12 weeks of age (n = 3/group). mRNA expression was assessed by real-time qPCR.

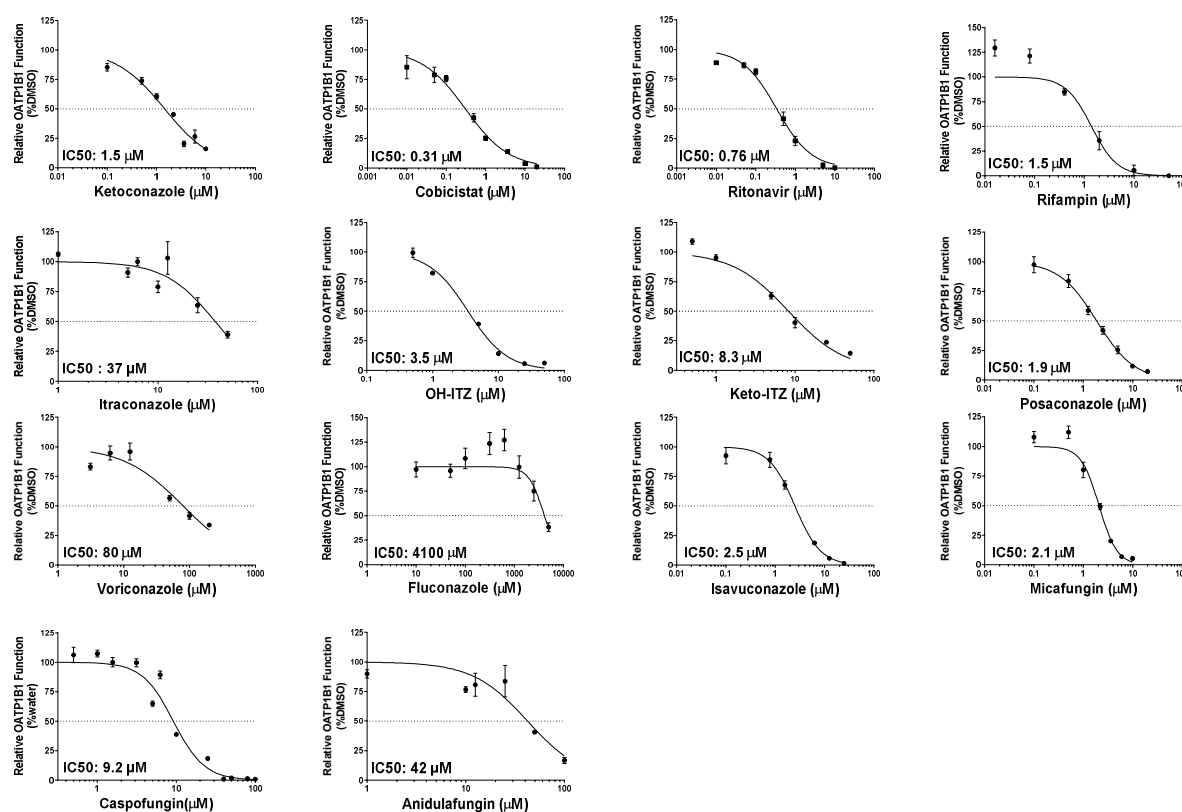

**Figure S5.** Inhibition of OATP1B1 function by indicated antifungal drugs in vitro. HEK293 cells expressing OATP1B1 or VC were pre-incubated with indicated antifungal drugs at the indicated concentrations for 15 minutes before incubation with the indicated antifungal and [<sup>3</sup>H]Estradiol-17 $\beta$ -D-glucuronide for 15 minutes. Data represent uptake of OATP1B1-expressing cells at each concentration compared against vehicle after subtracting uptake by VC cells (mean  $\pm$  SEM). Each concentration consists of 6–9 technical replicates across 2–3 biological replicates, except for OH-ITZ and Keto-ITZ which were only completed once due to limited reagent.

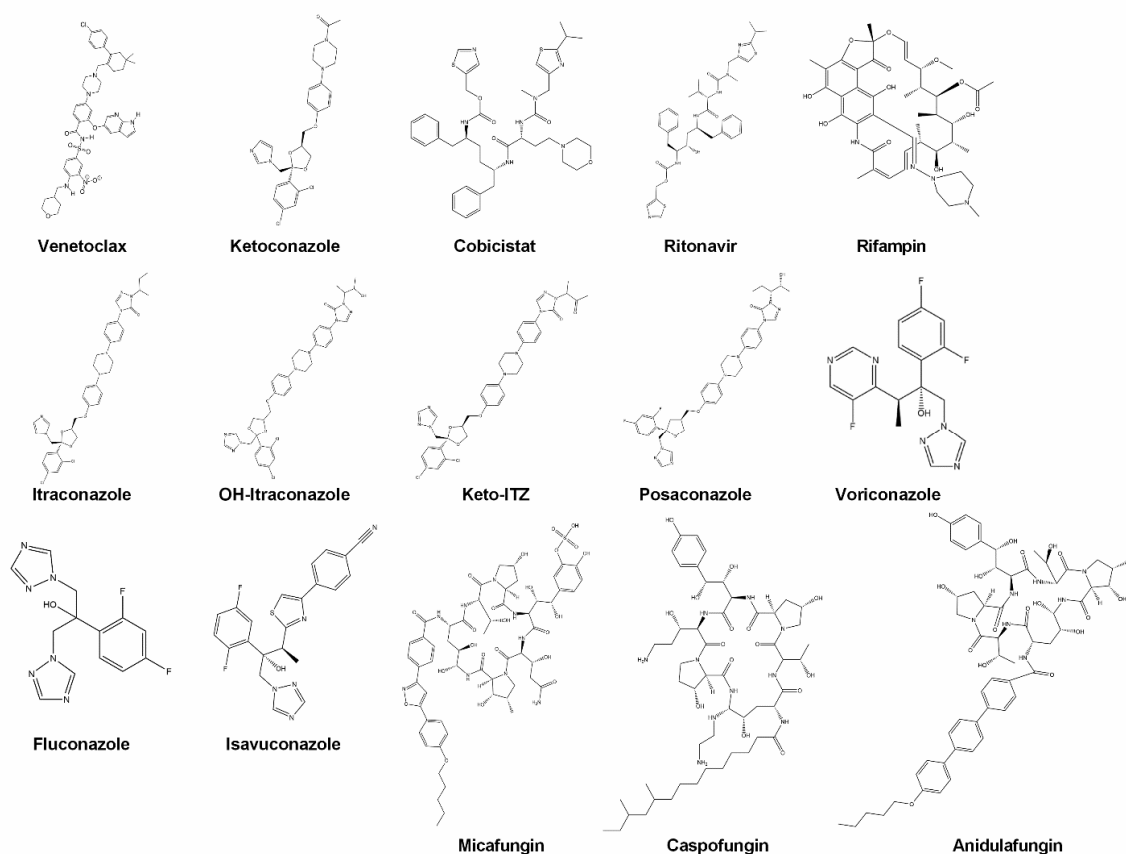

Figure S6. Chemical structures of venetoclax and inhibitors.

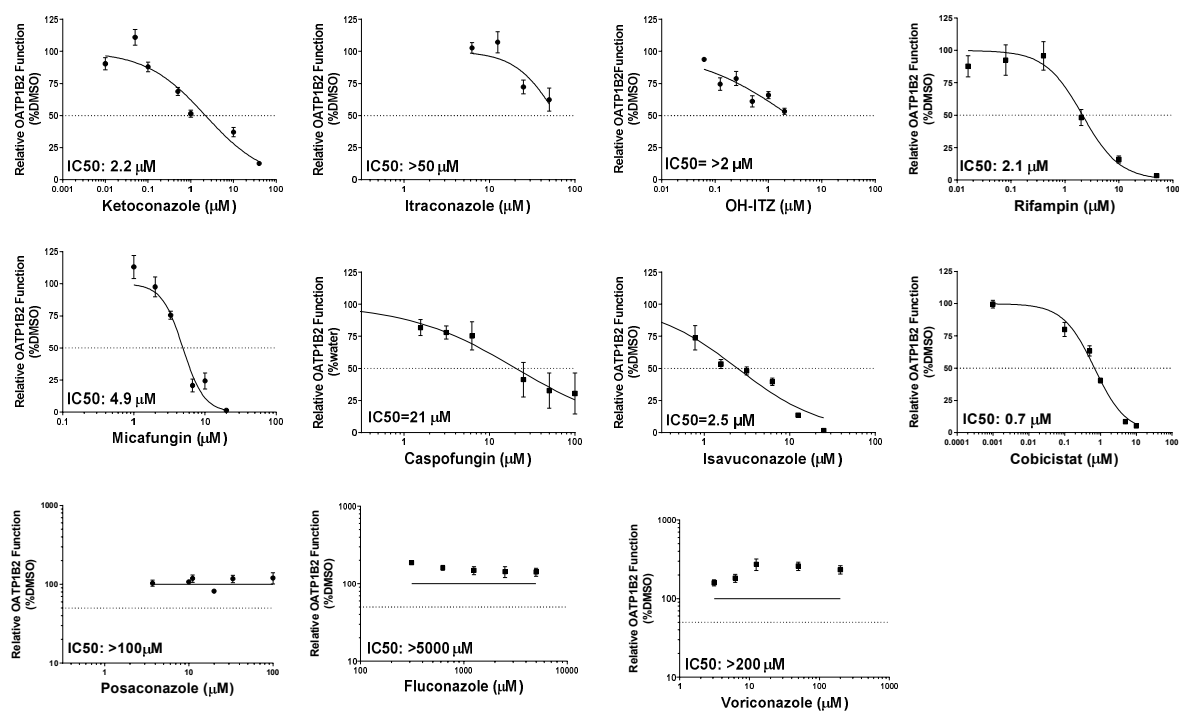

Figure S7. Inhibition of OATP1B2 function by indicated antifungal drugs in vitro. HEK293 cells expressing OATP1B2 or VC were pre-incubated with indicated antifungal drugs at the indicated concentrations for 15 minutes before incubation with the indicated antifungal and [<sup>3</sup>H]Estradiol-

17 $\beta$ -D-glucuronide for 15 minutes. Data represent uptake of OATP1B2-expressing cells at each concentration compared against vehicle after subtracting uptake by VC cells (mean  $\pm$  SEM). Each concentration consists of 6–9 technical replicates across 2–3 biological replicates, except for OH-ITZ which was only completed once due to limited reagent.

**Table S1.** Venetoclax pharmacokinetic parameters.

| Mouse genotype | N | Sex | Co-treatment (dose mg/kg) | Venetoclax C <sub>max</sub> (ng/mL) | Venetoclax AUC <sub>(0-last)</sub> (ng*h/mL) | Venetoclax AUC Fold increase |
|----------------|---|-----|---------------------------|-------------------------------------|----------------------------------------------|------------------------------|
| Wild-type FVB  | 5 | F   | None                      | 1540 (550)                          | 7430 (910)                                   |                              |
| CYP3A(-/-)     | 3 | F   | None                      | 3400 (780)*                         | 13700 (1600)**                               | 1.8                          |
| Wild-type DBA  | 5 | M   | None                      | 958 (54)                            | 5270 (450)                                   |                              |
| OATP1B2(-/-)   | 5 | M   | None                      | 1610 (170)**                        | 9200 (730)***                                | 1.7                          |

Values are the mean with standard error in parenthesis. Abbreviations: C<sub>max</sub>, maximum plasma concentration; AUC<sub>0-last</sub>, area under the concentration-time curve (AUC) from time zero to the last observed timepoint; \*  $p < 0.05$ , \*\*  $p < 0.01$ , \*\*\*  $p < 0.001$ .

**Table S2.** Clinical pharmacokinetics of antifungal agents.

| Inhibitor     | Name Brand | Initial FDA Approval (year) <sup>a</sup> | Antifungal Prophylaxis Regimen | Citation (PMID) | Clinical PK Study Regimen | C <sub>max,ss</sub> (μM) | Citation (PMID) | Fraction Unbound <sup>b</sup> (fup) (%) | Citation (PMID) |
|---------------|------------|------------------------------------------|--------------------------------|-----------------|---------------------------|--------------------------|-----------------|-----------------------------------------|-----------------|
| Ketoconazole  | Nizoral    | 1981                                     | 200mg-400mg QD <sup>c</sup>    | 25229352        | 200mg QD                  | 1.88                     | 26668209        | 3.2                                     | 11744613        |
| Ritonavir     | Norvir     | 1996                                     | ND                             | ND              | 100mg BID                 | 1.9                      | 15105105        | 1                                       | 25989229        |
| Cobicistat    | Tybest     | 2012                                     | ND                             | ND              | 150mg QD                  | 1.29                     | 26319088        | 2.71                                    | 24550332        |
| Rifampin      | Rifadin    | 1974                                     | ND                             | ND              | 600mg QD (IV)             | 29                       | 27526979        | 11                                      | 25801554        |
| Itraconazole  | Sporanox   | 1997                                     | 200mg BID for 2 days           | 12729424        | 100mg QD                  | 1.15                     | 17495874        | 3.6                                     | 17495874        |
| Hydroxy-ITZ   | ND         | ND                                       | ND                             | ND              | ND                        | 0.608                    | 17495874        | 0.44                                    | 17495874        |
| Keto-ITZ      | ND         | ND                                       | ND                             | ND              | ND                        | 0.023                    | 17495874        | 5.3                                     | 17495874        |
| Posaconazole  | Noxafil    | 2006                                     | 300mg QD                       | 26612870        | 300mg QD                  | 2.75                     | 26612870        | <2                                      | 32178468        |
| Voriconazole  | Vfend      | 2002                                     | 200mg BID                      | 19747629        | 200mg BID                 | 10.2                     | 23766489        | 33–49                                   | 32178468        |
| Fluconazole   | Diflucan   | 1990                                     | 400mg QD                       | 16339606        | 400mg QD                  | 61.7                     | 2196167         | 88–89                                   | 32178468        |
| Isavuconazole | Cresamba   | 2015                                     | 200mg QD                       | 32236406        | 200mg QD                  | 8.23                     | 25624327        | <1                                      | 32178468        |
| Micafungin    | Mycamine   | 2005                                     | 100mg QD                       | 29746955        | 100mg QD                  | 17.3                     | 28791666        | <1                                      | 32178468        |
| Caspofungin   | Cancidas   | 2001                                     | 50mg QD                        | 16377679        | 50mg QD                   | 7.99                     | 11850256        | 5                                       | 32178468        |
| Anidulafungin | Eraxis     | 2006                                     | 200mg once, then 100mg QD      | 25376267        | 200mg once, then 100mg QD | 6.14                     | 21486730        | 1                                       | 32178468        |

<sup>a</sup>Based on the first available formulation. <sup>b</sup>f<sub>up</sub> was calculated by subtracting the protein binding from 100%. <sup>c</sup>Ketoconazole is generally not used clinically for antifungal prophylaxis. Abbreviations: C<sub>max,ss</sub>, maximum plasma concentration at steady-state; ND, not determined.
